# Supplementary material
Source: Springer Nature journal article supplement (https://www.springermedizin.de/resource/supplementary/12907_2010_81_MOESM1_ESM.pdf/9524620)
Supplement: MOESM1 [file 9524620]

2842 patients with breast cancer  
in FinProg database

Excluded

DCIS n=203

Distant metastases present at  
diagnosis n=136

Bilateral breast cancer n=261

Other malignancy n=235

No breast surgery n=42

2032

Excluded

Tissue block not available  
n=101

1931

Excluded

Tissue core not available or not  
representative n=597

1334 patients with  
1648 tissue core images  
available for analysis
